# Supplementary material for: In Vitro Synthesized RNA Generated from cDNA Clones of Both Genomic Components of Cucurbit yellow stunting disorder virus Replicates in Cucumber Protoplasts
Source: MDPI journal article supplement (doi:10.3390/v8060170), 2016-06-14
Supplement: s1 [file s1]

# Supplementary Materials: *In Vitro* Synthesized RNA Generated from cDNA Clones of Both Genomic Components of *Cucurbit yellow stunting disorder virus* Replicates in Cucumber Protoplasts

Carolyn A. Owen, Romy Moukarzel, Xiao Huang, Mona A. Kassem, Eleonora Eliasco, Miguel A. Aranda, Robert H.A. Coutts and Ioannis C. Livieratos

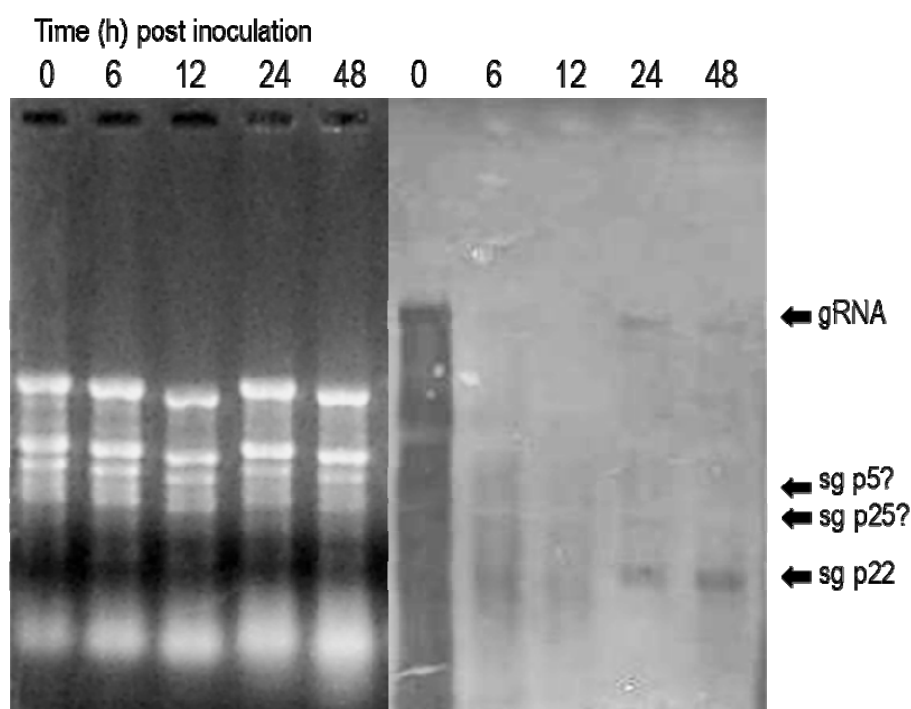

**Figure S1.** Input mRNA in *C. sativus* protoplasts transfected with CYSDV RNA1 mRNA is reduced to undetectable levels at 12 h post-transfection, while *de novo*-synthesised CYSDV RNA1 is first detectable at 24 h p.i.. Northern blot of total protoplast RNA isolated at the indicated time points hybridised with the p22 negative (–) sense riboprobe. Extended exposures did not reveal the presence of full-length inoculate at 12 h p.i..

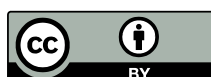

© 2016 by the authors; licensee MDPI, Basel, Switzerland. This article is an open access article distributed under the terms and conditions of the Creative Commons by Attribution (CC-BY) license (<http://creativecommons.org/licenses/by/4.0/>).
